# Supplementary material for: The draft genome of Primula veris yields insights into the molecular basis of heterostyly
Source: PubMed Central journal article supplement (PMC4305239; doi:10.1186/s13059-014-0567-z), 2015-01-24

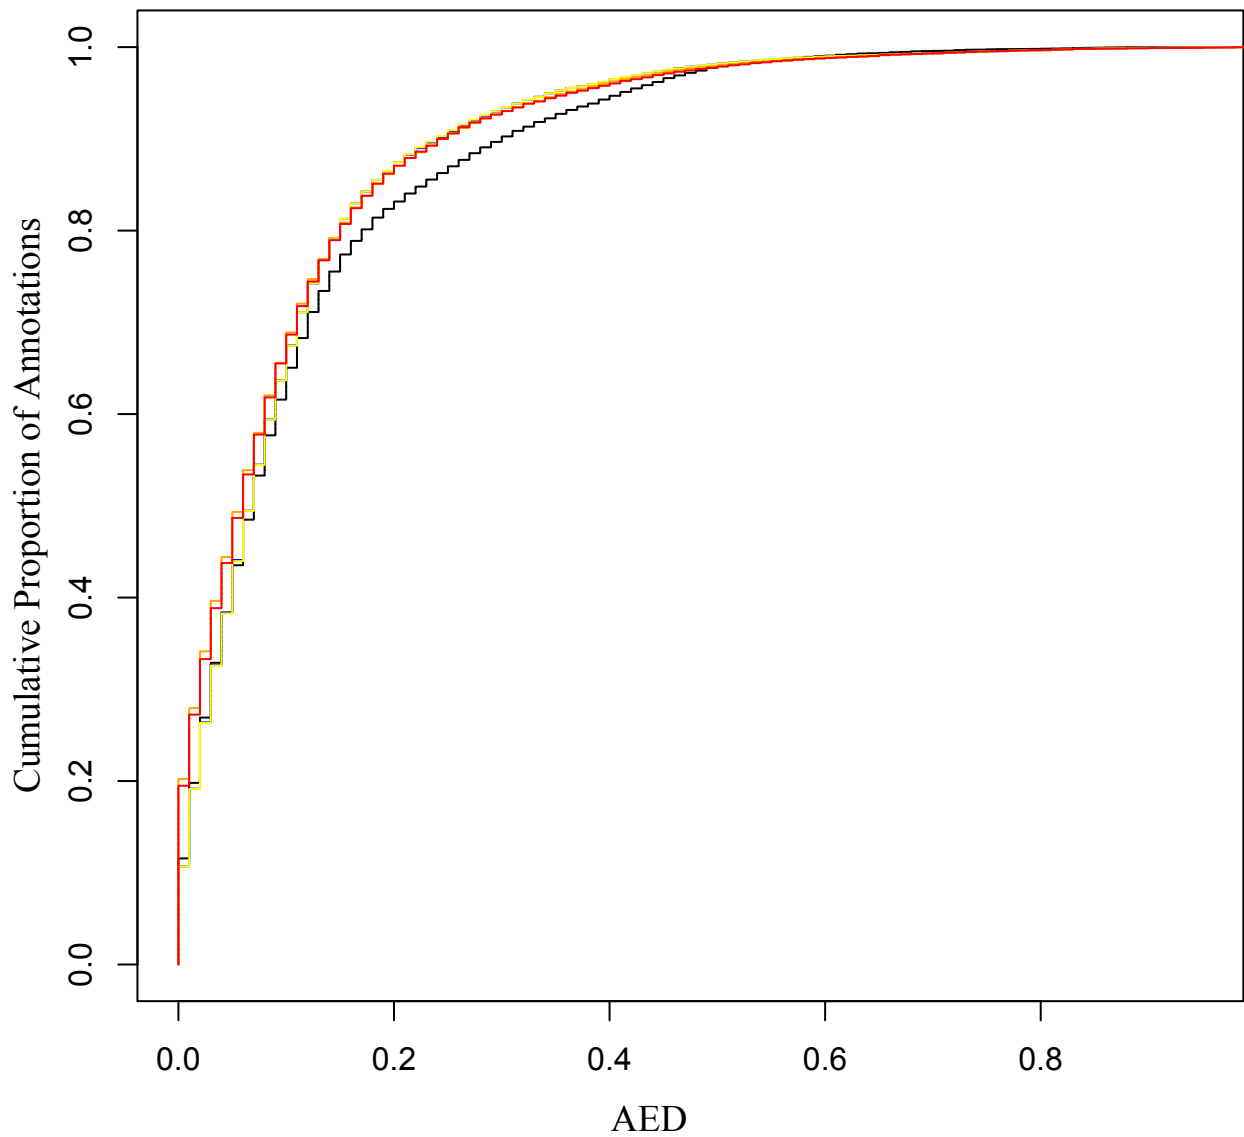

Supplement: 13059_2014_567_MOESM3_ESM.pdf [file 13059_2014_567_MOESM3_ESM.pdf]
